# Supplementary material
Source: Springer Nature journal article supplement (https://www.springermedizin.de/resource/supplementary/13023_2013_639_MOESM7_ESM.pdf/9642540)

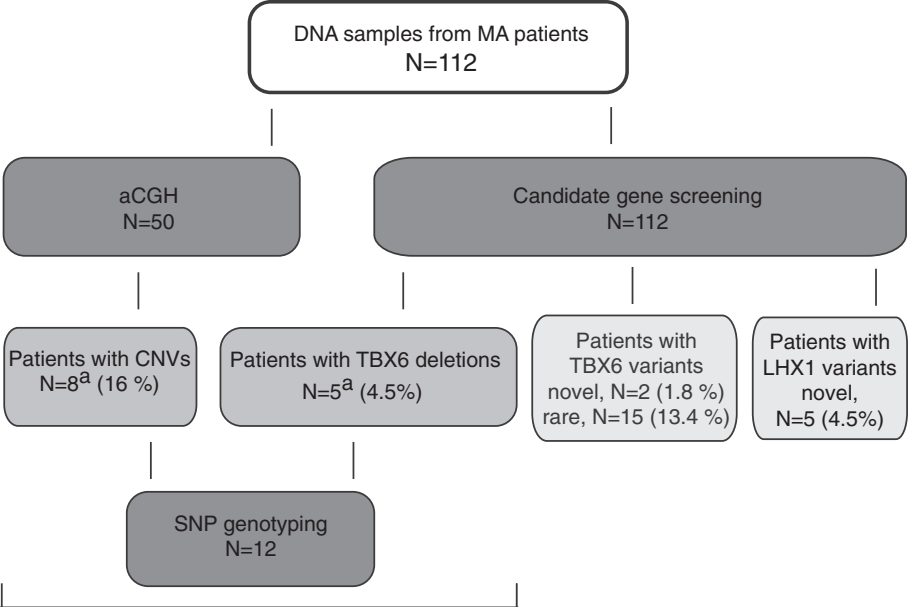

**Patients investigated for CNVs, N=54**

<sup>a</sup> patient 69 included in both sample series

Supplement: MOESM7 [file 9642540]
